# Supplementary material for: Nicotinamide mononucleotide impacts HIV-1 infection by modulating immune activation in T lymphocytes and humanized mice
Source: PubMed Central journal article supplement — eBioMedicine. 2023 Nov 17;98:104877. doi: 10.1016/j.ebiom.2023.104877 (PMC10694053; doi:10.1016/j.ebiom.2023.104877), 2023-11-17
Supplement: mmc2.pdf [file mmc2.pdf]

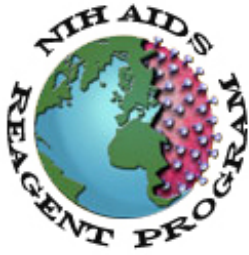

## NIH AIDS Reagent Program

20301 Century Boulevard  
Building 6, Suite 200  
Germantown, MD 20874  
USA

Phone: 240 686 4740  
Fax: 301 515 4015  
aidsreagent.org

### DATA SHEET

|                                 |                                                                                                                                                                                                                                                                                                                                                                                                                                    |
|---------------------------------|------------------------------------------------------------------------------------------------------------------------------------------------------------------------------------------------------------------------------------------------------------------------------------------------------------------------------------------------------------------------------------------------------------------------------------|
| <b>Reagent:</b>                 | ACH-2 Cells                                                                                                                                                                                                                                                                                                                                                                                                                        |
| <b>Catalog Number:</b>          | 349                                                                                                                                                                                                                                                                                                                                                                                                                                |
| <b>Lot Number:</b>              | 130119                                                                                                                                                                                                                                                                                                                                                                                                                             |
| <b>Release Category:</b>        | C                                                                                                                                                                                                                                                                                                                                                                                                                                  |
| <b>Provided:</b>                | 1.8 x 10 <sup>7</sup> cells/ml (1 mL provided). Viability is 90%.                                                                                                                                                                                                                                                                                                                                                                  |
| <b>Cell Type:</b>               | Subclone A3.01, which is derived from CEM, a human T cell line originally isolated from a four-year-old Caucasian female with acute lymphoblastic leukemia.                                                                                                                                                                                                                                                                        |
| <b>Propagation Medium:</b>      | RPMI 1640 supplemented with 10 mM HEPES, 2 mM L-glutamine, 90%; heat inactivated fetal bovine serum, 10%.                                                                                                                                                                                                                                                                                                                          |
| <b>Freeze Medium:</b>           | RPMI 1640, 82.5%; heat inactivated fetal bovine serum, 10%; DMSO, 7.5%.                                                                                                                                                                                                                                                                                                                                                            |
| <b>Growth Characteristics:</b>  | Cells grow in single cell suspension with some visible clumping. Passage the cells every three days to give a concentration of 1 x 10 <sup>6</sup> cells/ml. Doubling time is 24 hours. ACH-2 cells require RPMI 1640 with supplements for regular growth but they can also be grown in OPTI-MEM containing 2.5% fetal bovine serum, 2.0 mM L-glutamine, 100 U/ml penicillin, 100 µg/ml streptomycin and 0.5 µM β-mercaptoethanol. |
| <b>Description:</b>             | HIV-1 latent T cell clone with one integrated proviral copy.                                                                                                                                                                                                                                                                                                                                                                       |
| <b>Special Characteristics:</b> | Cells are CD4-, CD5+, transferrin receptor+, Leu-1+, HIV-1+. Parent A3.01 cells were infected with LAV and cloned by limiting dilution. ACH-2 is a clone that survived infection and constantly produces low levels of supernatant RT and p24. Can be induced with phorbol myristate acetate or TNF-α to secrete high levels of infectious HIV-1.                                                                                  |
| <b>Recommended Storage:</b>     | Liquid nitrogen                                                                                                                                                                                                                                                                                                                                                                                                                    |

---

ALL RECIPIENTS OF THIS MATERIAL MUST COMPLY WITH ALL APPLICABLE BIOLOGICAL, CHEMICAL, AND/OR RADIOCHEMICAL SAFETY STANDARDS INCLUDING SPECIAL PRACTICES, EQUIPMENT, FACILITIES, AND REGULATIONS. NOT FOR USE IN HUMANS.

**Contributor:** Dr. Thomas Folks.

**References:** Clouse KA, Powell D, Washington I, Poli G, Strebel K, Farrar W, Barstad P, Kovacs J, Fauci AS, Folks TM. Monokine regulation of human immunodeficiency virus-1 expression in a chronically infected human T cell clone. *J Immunol* **142**:431-438, 1989.

Folks TM, Clouse KA, Justement J, Rabson A, Duh E, Kehrl JH, Fauci AS. Tumor necrosis factor a induces expression of human immunodeficiency virus in a chronically infected T-cell clone. *Proc Natl Acad Sci USA* **86**:2365-2368, 1989.

**NOTE:** Acknowledgment for publications should read "The following reagent was obtained through the NIH AIDS Reagent Program, Division of AIDS, NIAID, NIH: ACH-2 from Dr. Thomas Folks." Also include the references cited above in any publications.

**Scientists at for-profit institutions or who intend commercial use of this reagent must contact Dr. Sally Hu at the NIH Office of Technology Transfer, Email: [hus@mail.nih.gov](mailto:hus@mail.nih.gov), Phone: 301-435-5606, before the reagent can be released. Please specify the name and a description of the intended use of the reagent.**

**Last Updated** November 13, 2014

---

ALL RECIPIENTS OF THIS MATERIAL MUST COMPLY WITH ALL APPLICABLE BIOLOGICAL, CHEMICAL, AND/OR RADIOCHEMICAL SAFETY STANDARDS INCLUDING SPECIAL PRACTICES, EQUIPMENT, FACILITIES, AND REGULATIONS. NOT FOR USE IN HUMANS.
