# Supplementary material for: Nicotinamide mononucleotide impacts HIV-1 infection by modulating immune activation in T lymphocytes and humanized mice
Source: PubMed Central journal article supplement — eBioMedicine. 2023 Nov 17;98:104877. doi: 10.1016/j.ebiom.2023.104877 (PMC10694053; doi:10.1016/j.ebiom.2023.104877), 2023-11-17
Supplement: mmc3.pdf [file mmc3.pdf]

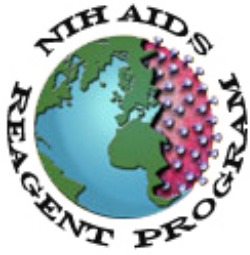

## NIH AIDS Reagent Program

20301 Century Boulevard  
Building 6, Suite 200  
Germantown, MD 20874  
USA

Phone: 240 686 4740  
Fax: 301 515 4015  
aidsreagent.org

### DATA SHEET

|                                 |                                                                                                                                                                                                                                |
|---------------------------------|--------------------------------------------------------------------------------------------------------------------------------------------------------------------------------------------------------------------------------|
| <b>Reagent:</b>                 | MOLT-4 CCR5+ Cells                                                                                                                                                                                                             |
| <b>Catalog Number:</b>          | 4984                                                                                                                                                                                                                           |
| <b>Lot Number:</b>              | 100205                                                                                                                                                                                                                         |
| <b>Release Category:</b>        | E                                                                                                                                                                                                                              |
| <b>Provided:</b>                | 4.5 x 10 <sup>6</sup> cells/mL. Viability is 70%.                                                                                                                                                                              |
| <b>Propagation Medium:</b>      | RPMI 1640 medium supplemented with G418 (1mg/ml), 10% FBS.                                                                                                                                                                     |
| <b>Freeze Medium:</b>           | Propagation medium, 90%; DMSO, 10%.                                                                                                                                                                                            |
| <b>Sterility:</b>               | Negative for mycoplasma, bacteria and fungi.                                                                                                                                                                                   |
| <b>Description:</b>             | CCR5 expression plasmid was transfected into MOLT-4 cells. Stable transfectants were selected in culture medium containing G418 (1mg/ml). The expression of CCR5 on their surface was analyzed by laser flow cytometry.        |
| <b>Special Characteristics:</b> | MOLT-4/CCR5 highly susceptible to R5 HIV Type 1.<br>CCR5 expression detectable by FACS (>96%).                                                                                                                                 |
| <b>Recommended Storage:</b>     | Liquid nitrogen.                                                                                                                                                                                                               |
| <b>Contributor:</b>             | Dr. Masanori Baba, Dr. Hiroshi Miyake, and Dr. Yuji Iizawa.                                                                                                                                                                    |
| <b>References:</b>              | Baba M, Miyake H, Okamoto M, Iizawa Y, Okonogi K. Establishment of a CCR5-expressing T-lymphoblastoid cell line highly susceptible to R5 HIV Type 1. <i>AIDS Research and Human Retroviruses</i> <b>16</b> (10):935-941, 2000. |

---

ALL RECIPIENTS OF THIS MATERIAL MUST COMPLY WITH ALL APPLICABLE BIOLOGICAL, CHEMICAL, AND/OR RADIOCHEMICAL SAFETY STANDARDS INCLUDING SPECIAL PRACTICES, EQUIPMENT, FACILITIES, AND REGULATIONS. NOT FOR USE IN HUMANS.

**NOTE:**

Acknowledgment for publications should read "The following reagent was obtained through the NIH AIDS Reagent Program, NIAID, NIH: MOLT-4/CCR5 from Dr. Masanori Baba, Dr. Hiroshi Miyake, Dr. Yuji Iizawa." Also include the reference cited above in any publications.

**Recipient must not use or incorporate the reagent for commercial purposes.**

**Last Updated**

October 09, 2015

---

ALL RECIPIENTS OF THIS MATERIAL MUST COMPLY WITH ALL APPLICABLE BIOLOGICAL, CHEMICAL, AND/OR RADIOCHEMICAL SAFETY STANDARDS INCLUDING SPECIAL PRACTICES, EQUIPMENT, FACILITIES, AND REGULATIONS. NOT FOR USE IN HUMANS.
