# Supplementary material for: Nicotinamide mononucleotide impacts HIV-1 infection by modulating immune activation in T lymphocytes and humanized mice
Source: PubMed Central journal article supplement — eBioMedicine. 2023 Nov 17;98:104877. doi: 10.1016/j.ebiom.2023.104877 (PMC10694053; doi:10.1016/j.ebiom.2023.104877), 2023-11-17
Supplement: mmc7.pdf [file mmc7.pdf]

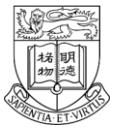

## Bioresearch Support Core

# Mycoplasma Screening Report

---

### Sample of:

---

Name : MO YUFEI  
Staff/Student No. : 99036  
Email : mophie@hku.hk;  
moyuf82@connect.hku.hk  
Phone : 67452925  
Department : AIDS Institute  
Name of Supervisor : Prof Zhiwei Chen  
Email of Supervisor : zchenai@hku.hk  
Date : 21<sup>st</sup> Jun, 2022

### Sample Details:

---

|                      |                 |               |               |
|----------------------|-----------------|---------------|---------------|
| Cell line/ATCC No.   | : MOLT4-ccr5    | MOLT4-ccr5    | MOLT4-ccr5    |
| Organism             | : Human         | Human         | Human         |
| Tissue/Disease Model | :               |               |               |
| Cell Type            | : T lymphoblast | T lymphoblast | T lymphoblast |
| Culture properties   | : Suspension    | Suspension    | Suspension    |
| Culture days         | : 3 days        | 3 days        | 3 days        |
| Passage              | : 8             | 9             | 15            |
| Label on Sample Tube | : MYF-1         | MYF-2         | MYF-3         |
| Notes                | :               |               |               |

### Real-time PCR Detection of *Mycoplasma sp.*:

---

MYF-1 : Not Detected  
MYF-2 : Not Detected  
MYF-3 : Not Detected  
Positive Control : Detected  
Negative Control : Not Detected

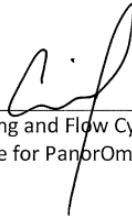  
Imaging and Flow Cytometry Core  
Centre for PanorOmic Sciences

Extraction and Detection method modified from

- 1) Uphoff CC1, Drexler HG. In Vitro Cell Dev Biol Anim. 2002 Feb;38(2):79-85.
- 2) Lesley Young et al. Nature Protocols volume 5, pages 929–934 (2010)
