# Supplementary material for: Nicotinamide mononucleotide impacts HIV-1 infection by modulating immune activation in T lymphocytes and humanized mice
Source: PubMed Central journal article supplement — eBioMedicine. 2023 Nov 17;98:104877. doi: 10.1016/j.ebiom.2023.104877 (PMC10694053; doi:10.1016/j.ebiom.2023.104877), 2023-11-17
Supplement: mmc9.pdf [file mmc9.pdf]

## STR profiling

梁轩毅 <tech@cellcook.com>

Sun 29/10/2023 21:21

To: moyuf82@connect.hku.hk <moyuf82@connect.hku.hk>

Dear Yufei,

Thanks for your inquiry.

After we checked the international cell line database Cellosaurus (<https://www.cellosaurus.org/index.html>), there are no public STR profiling information for either ACH-2 cell line or MOLT-4 CCR5+ cell line. For this reason, after performing the STR profiling of these two cell lines, the data of the two samples could not match the exactly two cell lines of ACH-2 or MOLT-4 CCR5+, but possibly match the ancestry with CCRF-CEM and MOLT-4 separately.

Best regards,

Xuanyi Liang

Cellcook Biotech Co., Ltd, Guangzhou, China

梁轩毅 硕士

Cell Phone: [15920186637](tel:15920186637) Email: [tech@cellcook.com](mailto:tech@cellcook.com)

Wechat: [liang-xuanyi](#) Website : [www.cellcook.com](http://www.cellcook.com)

Add: Cellcook Biotech Co., Ltd, Floor 1, Office Zone Building 1, Standard Property Unit 1, International Biotech Island, Guangzhou, 510300, China
